# Supplementary material for: Mixture models reveal multiple positional bias types in RNA-Seq data and lead to accurate transcript concentration estimates
Source: PubMed Central journal article supplement (PMC5448817; doi:10.1371/journal.pcbi.1005515), 2017-05-15
Supplement: pcbi.1005515.s001.pdf [file pcbi.1005515.s001.pdf]

# S1 Appendix

## Further properties of Mix<sup>2</sup>

Andreas Tuerk, Gregor Wiktorin, Serhat Güler

Lexogen GmbH  
Campus Vienna Biocenter 5, 1030 Vienna, Austria

November 29, 2016

# 1 Parameter estimation for the Mix<sup>2</sup> model

## 1.1 Derivation of the EM update formulas

The Expectation Maximization (EM) algorithm [1] increases the likelihood  $L(R|\theta)$  of a data set  $R$  under a model  $p(R|\theta)$  by maximizing, or more generally increasing, the auxiliary function

$$Q(\theta'|\theta) = E_{Z|R,\theta}(\log p(R, z|\theta')) \quad (1)$$

Here,  $\theta$  is the current parameter set of the model  $p(R|\theta)$  and  $\theta'$  is the new parameter set that needs to be optimized. In addition,  $Z = (z_r)_{r \in R}$  is a sequence of random hidden variables  $z_r$  and, hence, the expression on the right hand side of (1) is the expected value of  $\log p(R, z|\theta')$ , where  $z$  is one realization of  $Z$ , with respect to the random variable  $Z$  given  $R$  and  $\theta$ . The hidden variables in the Mix<sup>2</sup> model are the transcript variable,  $t = i$ , and the mixture variable,  $b = j$ .

A necessary condition for the maximization of  $Q(\theta'|\theta)$  is that the gradient of  $Q(\theta'|\theta)$  equals zero, i.e.

$$\frac{\partial}{\partial \theta'} Q(\theta'|\theta) = 0 \quad (2)$$

For the Mix<sup>2</sup> model this means that

$$\frac{\partial}{\partial \alpha_i} Q(\theta'|\theta) = 0 \quad (3)$$

and

$$\frac{\partial}{\partial \beta_{kj}} Q(\theta'|\theta) = 0 \quad (4)$$

where  $i$  is the index of transcript  $t = i$  and  $k$  is the index of group  $g = k$ . As usual, the update formula of the relative abundances  $\alpha_i$  is given by

$$\alpha_i^{(n+1)} = \frac{1}{|R|} \sum_r p^{(n)}(t = i|r) \quad (5)$$

where  $\alpha_i^{(n+1)}$  and  $p^{(n)}(t = i|r)$  are the relative abundance and posterior probability after the  $n + 1$ -th and  $n$ -th iteration of the EM algorithm. In addition to (4), the  $\beta_{kj}$  have to satisfy the constraint

$$\sum_{j=1}^M \beta_{kj} = 1 \quad (6)$$

where  $M$  is the number of mixture components. This constraint can be enforced with the Lagrange method. Taking the derivative with respect to  $\beta_{kj}$  leads to

$$\sum_{r \in R} p(g = k, b = j|r) + \beta_{kj} \lambda = 0 \quad (7)$$

which after some rearrangement results in

$$\beta_{kj}^{(n+1)} = \frac{\sum_r p^{(n)}(g = k, b = j|r)}{\sum_r p^{(n)}(g = k|r)} \quad (8)$$

where, as previously,  $\beta_{kj}^{(n+1)}$  and  $p^{(n)}(\cdot)$  are the mixture components and posterior probabilities after the  $n + 1$ -th and after the  $n$ -th iteration, respectively. The posterior probabilities in (8) are given by

$$p^{(n)}(g = k, b = j|r) = \sum_{i \in k} p^{(n)}(t = i, b = j|r) \quad (9)$$

and

$$p^{(n)}(g = k|r) = \sum_{i \in k} p^{(n)}(t = i|r) \quad (10)$$

where the sums in (9) and (10) extend over all transcripts  $t = i$  in group  $g = k$  and the posteriors on the right-hand side of these equations can be derived according to Bayes formula as follows

$$p^{(n)}(t = i, b = j|r) = \frac{\alpha_i^{(n)} \beta_{ij}^{(n)} p(r|t = i, b = j)}{\sum_{ij} \alpha_i^{(n)} \beta_{ij}^{(n)} p(r|t = i, b = j)} \quad (11)$$

and

$$p^{(n)}(t = i|r) = \frac{\sum_j \alpha_i^{(n)} \beta_{ij}^{(n)} p(r|t = i, b = j)}{\sum_{ij} \alpha_i^{(n)} \beta_{ij}^{(n)} p(r|t = i, b = j)} \quad (12)$$

The posterior probability  $p(r|t = i, b = j)$  in (11) and (12) is independent of the iteration. In the main paper the  $p(r|t = i, b = j)$  were chosen to be Gaussians which are equidistantly distributed across the transcript  $t = i$ .

Without any tying, the group  $g = k$  consists of a single transcript  $t = i$  and (8) therefore becomes

$$\beta_{ij}^{(n+1)} = \frac{\sum_r p^{(n)}(t = i, b = j|r)}{\sum_r p^{(n)}(t = i|r)} \quad (13)$$

For global tying, on the other hand, the group consists of all the transcripts within the locus and therefore

$$p(g = k|r) = 1 \quad (14)$$

As a result, the update formula (8) becomes

$$\beta_j^{(n+1)} = \frac{1}{|R|} \sum_r p^{(n)}(b = j|r) \quad (15)$$

It is interesting to note, that (15) is similar to the update formula for the relative abundances  $\alpha_i$ , equation (5). This is the case, because for global tying the following holds

$$p(r) = \sum_j \beta_j p(r|b = j) \quad (16)$$

which is similar to the superposition

$$p(r) = \sum_i \alpha_i p(r|t = i) \quad (17)$$

## Multi-mapping reads and sequence specific bias

The previous discussion assumes that a fragment  $r$  maps uniquely to the genomic reference. If, on the other hand, fragment  $r$  has multiple hits  $H(r)$  on the reference, then

$$p(h|r) = \frac{p(h)}{\sum_{h \in H(r)} p(h)} \quad (18)$$

needs to be taken into account when estimating the parameters of the Mix<sup>2</sup> model. Rather than calculating (18) during parameter estimation  $p(h|r)$  is often set to  $1/\#H(r)$  [2]. Equation (18) can be extended to cover the situation of a sequence specific bias. In this case, the probability that a sequence  $seq(r)$  within or surrounding fragment  $r$  is generated can be smaller than 1 and the right-hand side of equation (18) needs to be multiplied by this sequence specific probability,  $p(generate|seq(r))$ . The probability  $p(generate|seq(r))$  can, for instance, be estimated as in [4] by calculating the ratio of the probability of the sequence  $seq(r)$  under the biased model to the uniform model. Most commonly,  $seq(r)$  is a sequence directly preceding or following  $r$  and  $p(generate|seq(r))$  therefore reflects the probability that a primer with start sequence  $seq(r)$  anneals to the sample. Details on how equation (18) and its generalization to a sequence specific bias fits into the parameter estimation of the Mix<sup>2</sup> model are given in Section "Parameter estimation". It should be noted that in our current implementation of the Mix<sup>2</sup> model we do not take sequence specific bias into consideration, nor do we use (18) to calculate the posterior probability of a hit.

If fragment  $r$  has multiple hits  $H(r)$  and a sequence specific bias then

$$p(t = i, b = j|r) = \sum_{h \in H(r)} p(t = i, b = j|h) p(h|r) \quad (19)$$

and the update formula for  $\beta_{kj}$ , equation (8), becomes

$$\beta_{kj}^{(n+1)} = \frac{\sum_{r \in R} \sum_{h \in H(r)} p^{(n)}(g = k, b = j|h) p(h|r)}{\sum_{r \in R} \sum_{h \in H(r)} p^{(n)}(g = k|h) p(h|r)}. \quad (20)$$

Here  $p(h|r)$  is given by equation (18) or the right-hand side of equation (18) multiplied by  $p(generate|seq(r))$  the probability of generating the sequence  $seq(r)$ , which is either part of or surrounding fragment  $r$ .

## 1.2 Identifiability and uniqueness of maximum likelihood solution

The Mix<sup>2</sup> model is identifiable on the set of fragments  $R$  iff the mapping  $\theta \rightarrow p_\theta(R)$  is injective, where, as in the previous section,  $\theta$  is the vector of pairs of parameters

$$\theta = ((a_i, b_{i,j}))_{i=1,\dots,N \wedge j=1,\dots,M} \quad (21)$$

The mapping  $\theta \rightarrow p_\theta(R)$  is given by the product of two mappings

$$p_\theta(R) = A \cdot M \cdot \theta \quad (22)$$

where  $A$  is the linear map given by

$$A = (a_{r,(i,j)})_{r \in R \wedge (i,j) \in (1,\dots,N) \times (1,\dots,M)} \quad (23)$$

with

$$a_{r,(i,j)} = p(r|t = i, b = j) \quad (24)$$

which is the value of the  $j$ -th Gaussian of transcript  $i$  for fragment  $r$ . Hence  $r$  is an index for the rows and the pair  $(i, j)$  is an index for the columns of  $A$ . The second mapping in (22) is componentwise multiplication of  $\theta$  given by

$$M(\theta) \rightarrow ((a_i b_{i,j}))_{i=1,\dots,N \wedge j=1,\dots,M} \quad (25)$$

The mapping  $M$  is invertible on the parameters  $\theta$  since

$$\sum_j \alpha_i \beta_{ij} = \alpha_i \quad (26)$$

and thus equation (22) is injective iff  $A$  is injective on the set  $M\theta$ , which is the  $NM - 1$  simplex  $\Delta^{NM-1}$ . This condition can be checked by first checking the stronger condition of injectivity of  $A$  on the full linear space  $\mathbb{R}^{N \times M}$ . If  $A$  is injective on  $\mathbb{R}^{N \times M}$  then, clearly,  $A$  is injective on  $\Delta^{NM-1}$ . If, on the other hand,  $A$  is not injective on  $\mathbb{R}^{N \times M}$  then it is necessary to check whether differences of elements in  $\Delta^{NM-1}$  other than 0 lie in the kernel of  $A$  on  $\mathbb{R}^{N \times M}$ . The latter will be the case if the dimension of the kernel of  $A$  is greater than 1, since then

$$\dim(\ker(A)) + \dim(\Delta^{NM-1}) > \dim(\mathbb{R}^{N \times M}) \quad (27)$$

The dimension of the kernel of  $A$  is, for instance, greater than 1 if two transcripts  $t = i$  and  $t = i'$  share the same Gaussian  $b = j$  and  $b = j'$ , which happens only if the transcripts have the same length and their exons are properly aligned. This situation can be avoided by shifting the Gaussians  $p(r|t = i, b = j)$ ,  $p(r|t = i', b = j')$  away from each other, which ensures that

$$p(r|t = i, b = j) \neq p(r|t = i', b = j') \quad (28)$$

and removes therefore identical columns in  $A$ . Shifting the Gaussians means that some of them are not equidistantly distributed along a transcript but has otherwise a minor effect on the properties of the Mix<sup>2</sup> model. Summarizing, we state the following

**Proposition 1.** *A sufficient condition for the identifiability of the Mix<sup>2</sup> model is the injectivity on  $\mathbb{R}^{N \times M}$  of the matrix  $A$  in equations (23) and (24). If the Mix<sup>2</sup> model fails to be identifiable because two transcripts  $t = i$  and  $t = i'$  share one Gaussian for two of their mixture components  $b = j$  and  $b = j'$ , then the Mix<sup>2</sup> model can be made identifiable by shifting the Gaussians  $p(r|t = i, b = j)$ ,  $p(r|t = i', b = j')$  away from each other.*

Equation (26) shows further that the Mix<sup>2</sup> model is equivalent to a mixture model of the distributions  $p(r|t = i, b = j)$  with mixture weights  $c_{ij}$  if no Gaussian is shared between two transcripts. In this case, the maximum likelihood solution for the  $c_{ij}$  is unique, since the log likelihood surface of mixture models is concave [3], and the  $c_{ij}$  and the parameters of the Mix<sup>2</sup> model stand in a one-to-one relationship. This can be summarized as follows.

**Proposition 2.** *The Mix<sup>2</sup> model is equivalent to a mixture of the distributions  $p(r|t = i, b = j)$  with respective mixture weights  $c_{ij}$  if no two transcripts share the same Gaussian. Since the log likelihood function for a mixture*

is concave there exists a unique maximum likelihood solution for the  $c_{ij}$  to which the EM algorithm converges. The  $\alpha_i$  and  $\beta_{ij}$  of the  $Mix^2$  model can be derived, in this case, from the  $c_{ij}$  as follows.

$$\alpha_i = \sum_{j=1}^M c_{ij} \quad (29)$$

$$\beta_{ij} = \frac{c_{ij}}{\alpha_i} \quad (30)$$

## 2 Fragment start distributions in Cufflinks

The Mix<sup>2</sup> model in the main paper factorizes the transcript specific fragment distribution  $p(r|t = i)$  as follows

$$p(r|t = i) = p(s(r)|t = i)p(l(r)|s(r), t = i) \quad (31)$$

where  $s(r)$  and  $l(r)$  are the start and length of fragment  $r$ . Cufflinks [5], on the other hand, reverses the order of  $s(r)$  and  $l(r)$  in (31) and factorizes  $p(r|t = i)$  according to

$$p(r|t = i) = p(l(r)|t = i)p(s(r)|l(r), t = i) \quad (32)$$

The fragment length distribution  $p(l(r)|t = i)$  in (32) is derived from the cumulative distribution of fragment lengths  $p(l(r))$  for the complete data set. For this purpose,  $p(l(r))$  is truncated to the possible fragment lengths for transcript  $t = i$  and subsequently renormalized such that

$$\sum_{l=1}^{l(t=i)} p(l|t = i) = 1 \quad (33)$$

where  $l(t = i)$  is the length of transcript  $t = i$ . The fragment start distribution  $p(s(r)|l(r), t = i)$ , on the other hand, is assumed to be uniform over the possible fragment starts  $s(r)$  for transcript  $t = i$  and fragment length  $l(r)$ , i.e.

$$p(s(r)|l(r), t = i) = \frac{1}{l(t = i) - l(r) + 1} \quad (34)$$

The fragment start distribution  $p(s(r)|t = i)$  for  $t = i$  according to the Cufflinks model can be derived by summing  $l(r)$  out of (32). In the absence of fragment length information, e.g. for single-end RNA-Seq data, Cufflinks assumes by default a Gaussian with mean 200 and standard deviation 80 for the cumulative fragment length distribution  $p(l(r))$ . For this default setting the fragment start distribution  $p(s(r)|t = i)$  is given in Figure 2 (a) of the main article for transcripts with length between 400 bps and 3000 bps. It can be seen that for long transcripts the Gaussian distribution  $p(l(r))$  produces a short and steep tail at the end of  $p(s(r)|t = i)$ , whereas this tail shifts increasingly to the 5' end of the transcript for shorter transcripts. The assumption of a Gaussian with mean 200 and standard deviation 80 corresponds to a size selection of the fragments prior to sequencing. Thus, Figure 2 (a) in the main text shows that even for a uniform fragment distribution, size selection generates a transcript length specific bias.

## References

- [1] A. P. Dempster, N. M. Laird, and D. B. Rubin. Maximum likelihood from incomplete data via the EM algorithm. *Journal of the Royal Statistical Society, Series B*, 39(1):1–38, 1977.
- [2] Ali Mortazavi, Brian A Williams, Kenneth McCue, Lorian Schaeffer, and Barbara Wold. Mapping and quantifying mammalian transcriptomes by RNA-Seq. *Nature Methods*, 5(7):621–628, Jul 2008.
- [3] Pachter and Sturmfels, editors. *Algebraic Statistics for Computational Biology*. Cambridge University Press, 2005.
- [4] Adam Roberts, Cole Trapnell, Julie Donaghey, John L Rinn, and Lior Pachter. Improving RNA-Seq expression estimates by correcting for fragment bias. *Genome Biology*, 12(3):R22, Mar 2011.
- [5] Cole Trapnell, Brian A Williams, Geo Pertea, Ali Mortazavi, Gordon Kwan, Marijke J van Baren, Steven L Salzberg, Barbara J Wold, and Lior Pachter. Transcript assembly and quantification by RNA-Seq reveals unannotated transcripts and isoform switching during cell differentiation. *Nature Biotechnology*, 28(5):511–515, May 2010.
